# Supplementary material for: Clinical Characteristics and Predictors of In-hospital Mortality in Patients with Cardiogenic Shock: Results from the RESCUE Registry
Source: Research Square preprint supplement (doi:10.21203/rs.3.rs-102981/v1), 2020-11-12
Supplement: Supplementary file 1 [file 90e66e14e73f01af5e596297.docx]

**Clinical Characteristics and Predictors of In-hospital Mortality in Patients with Cardiogenic Shock: Results from the RESCUE Registry**

Jeong Hoon Yang, MD; Ki Hong Choi, MD; Young-Guk Ko, MD; Chul-Min Ahn, MD; Cheol Woong Yu, MD; Woo Jung Chun, MD; Woo Jin Jang, MD; Hyun-Joong Kim, MD; Bum Sung Kim, MD; Jang-Whan Bae, MD; Sang Yeub Lee, MD; Sung Uk Kwon, MD; Hyun-Jong Lee, MD, PhD; Wang Soo Lee, MD; Jin-Ok Jeong, MD; Sang-Don Park, MD; Seong-Hoon Lim, MD; Sungsoo Cho, MD; Taek Kyu Park, MD; Joo Myung Lee, MD; Young Bin Song, MD; Joo-Yong Hahn, MD; Seung-Hyuk Choi, MD; Hyeon-Cheol Gwon, MD

**Table of Contents**

1. **Supplementary Table**

**Supplementary Table 1**. Prospective and retrospective enrollments of each institute

| Institutes | Total (N=1,247) | Retrospective  (N=954) | Prospective  (N=293) |
| --- | --- | --- | --- |
| Samsung Medical Center | 249 | 144 | 105 |
| Severance Cardiovascular Hospital | 181 | 147 | 34 |
| Korea University Anam Hospital | 134 | 130 | 4 |
| Samsung Changwon Hospital | 122 | 46 | 76 |
| Konkuk University Hospital | 112 | 89 | 23 |
| Chungbuk National University Hospital | 91 | 90 | 1 |
| Inje University Ilsan Paik Hospital | 78 | 64 | 14 |
| Sejong General Hospital | 66 | 60 | 6 |
| Chung-Ang University Hospital | 67 | 63 | 4 |
| Chungnam National University Hospital | 57 | 57 | 0 |
| Inha University Hospital | 52 | 32 | 20 |
| Dankook University Hospital | 38 | 32 | 6 |
